# Supplementary material for: Tracking seasonal changes in North Sea zooplankton trophic dynamics using stable isotopes
Source: Springer Nature journal article supplement (doi:10.1007/s10533-011-9630-y), 2011-08-08
Supplement: MOESM1 [file 10533_2011_9630_MOESM1_ESM.pdf]

**Appendix 1** Phospholipid-derived fatty acids (as % of PLFA<sub>Total</sub>) of North Sea zooplankton collected at North Dogger (ND), the Oyster Grounds (OG) and at the Sean Gas fields in the southern Bight (SB) from February 2007 to April 2008. Results are shown for 16 different PLFAs, plus bacterial and other FAs. Zooplankton taxa: Apa = *Anomalocera patersoni*, Car = *Candacia armata*, Cfi = *Calanus finmarchicus*, Che = *C. helgolandicus*, Cty = *Centropages typicus*, Mlo = *Metridia longa*, Sel = *Sagitta elegans*, Tlo = *Temora longicornis*, Zoe = zoeae, Brachyura; other = minor PLFAs

| Site | Date    | Taxon | 14:0 | 16:0 | 16:1<br>(n-7) | 16:2<br>(n-4) | 18:0 | 18:1<br>(n-7) | 18:1<br>(n-9) | 18:2<br>(n-6) | 18:3<br>(n-3) | 18:4<br>(n-3) | 20:4<br>(n-3) | 20:4<br>(n-6) | 20:5<br>(n-3) | 22:4<br>(n-6) | 22:5<br>(n-3) | 22:6<br>(n-3) | ∑Bacterial<br>FA | Other<br>FA |
|------|---------|-------|------|------|---------------|---------------|------|---------------|---------------|---------------|---------------|---------------|---------------|---------------|---------------|---------------|---------------|---------------|------------------|-------------|
| ND   | Feb. 07 | Car   | 2.4  | 16.5 | 0.9           | 1.0           | 3.4  | 2.7           | 0.2           | 0.3           | 0.8           | 2.5           | <0.1          | 0.4           | 18.1          | <0.1          | 0.9           | 33.0          | 4.2              | 3.7         |
| ND   | Feb. 07 | Cfi   | 1.2  | 20.0 | 1.1           | 1.0           | 2.8  | 1.3           | 2.9           | 0.8           | <0.1          | 0.9           | <0.1          | <0.1          | 22.2          | <0.1          | <0.1          | 44.5          | 1.3              | <0.1        |
| ND   | Feb. 07 | Che   | 1.5  | 13.7 | 1.3           | <0.1          | 2.3  | 0.8           | 2.2           | 0.5           | <0.1          | <0.1          | 0.4           | 0.8           | 22.1          | <0.1          | 0.5           | 47.3          | 2.1              | 2.4         |
| ND   | Feb. 07 | Sel   | 1.1  | 11.7 | 5.9           | <0.1          | 1.2  | 1.1           | 9.5           | 0.4           | <0.1          | <0.1          | 0.5           | 1.3           | 21.1          | <0.1          | 0.5           | 32.7          | 3.0              | 4.1         |
| ND   | Apr. 07 | Car   | 2.1  | 16.3 | 6.4           | 0.3           | 1.7  | 1.3           | 5.4           | 0.8           | 0.9           | 1.8           | 0.6           | <0.1          | 18.0          | 0.4           | 0.5           | 26.3          | 5.0              | 2.8         |
| ND   | Apr. 07 | Cfi   | 1.5  | 15.7 | 0.8           | <0.1          | 2.3  | 0.8           | 1.4           | <0.1          | <0.1          | <0.1          | <0.1          | <0.1          | 23.5          | <0.1          | 0.6           | 47.6          | 2.4              | 2.5         |
| ND   | Apr. 07 | Che   | 1.6  | 17.3 | 1.0           | <0.1          | 2.8  | 0.9           | 1.3           | <0.1          | <0.1          | <0.1          | 0.3           | <0.1          | 20.9          | <0.1          | 0.4           | 48.2          | 2.4              | 1.9         |
| ND   | Apr. 07 | Sel   | 2.8  | 16.8 | 1.3           | 0.9           | 3.0  | 3.4           | <0.1          | 0.5           | 1.2           | 2.5           | <0.1          | <0.1          | 25.6          | <0.1          | 1.1           | 39.3          | 4.3              | <0.1        |
| ND   | May 07  | Cfi   | 2.0  | 20.4 | 1.6           | <0.1          | 3.1  | 1.0           | 2.5           | 0.9           | <0.1          | <0.1          | 0.2           | <0.1          | 19.8          | <0.1          | 0.4           | 44.5          | 1.7              | 0.8         |
| ND   | May 07  | Che   | 1.8  | 20.8 | 1.6           | <0.1          | 2.0  | 1.5           | 3.3           | 1.0           | <0.1          | <0.1          | 0.2           | <0.1          | 22.6          | <0.1          | 0.4           | 40.1          | 2.1              | 0.7         |
| ND   | May 07  | Pel   | 1.7  | 18.0 | 0.7           | <0.1          | <0.1 | 0.9           | 2.2           | 1.5           | <0.1          | <0.1          | <0.1          | 0.3           | 19.4          | <0.1          | 0.5           | 44.1          | 4.6              | 1.9         |
| ND   | May 07  | Sel   | 2.1  | 15.3 | 4.2           | <0.1          | 1.4  | 0.9           | 7.3           | 1.6           | <0.1          | 2.1           | 0.7           | 0.3           | 17.1          | <0.1          | 0.3           | 29.9          | 6.6              | 4.0         |
| ND   | Sep. 07 | Car   | 2.7  | 17.9 | 0.9           | 1.3           | 3.7  | 2.3           | <0.1          | 0.4           | 1.0           | 1.3           | <0.1          | 0.5           | 20.5          | 0.4           | 0.8           | 44.8          | 3.0              | <0.1        |
| ND   | Sep. 07 | Car   | 3.8  | 18.8 | 1.6           | 1.1           | 3.6  | 2.4           | 0.7           | 0.6           | 1.4           | 4.0           | 0.4           | 0.3           | 16.0          | <0.1          | 0.8           | 36.7          | 4.9              | 1.1         |
| ND   | Sep. 07 | Cfi   | 1.4  | 17.8 | 0.6           | 1.1           | 3.0  | 1.0           | 3.9           | 1.2           | 0.8           | 0.6           | 0.6           | <0.1          | 20.9          | <0.1          | 0.7           | 44.9          | 1.0              | <0.1        |
| ND   | Sep. 07 | Che   | 2.3  | 17.9 | 0.6           | 1.6           | 4.3  | 0.6           | 2.1           | 0.7           | 0.5           | 0.8           | 0.5           | 0.2           | 17.8          | <0.1          | 0.4           | 46.3          | 2.1              | 0.5         |
| ND   | Sep. 07 | Sel   | 2.2  | 14.0 | 3.5           | 0.8           | 2.0  | 1.0           | 8.2           | 2.2           | 1.4           | 1.5           | 0.6           | 0.4           | 14.8          | <0.1          | 0.4           | 30.5          | 4.5              | 2.3         |
| ND   | Oct. 07 | Car   | 2.5  | 16.3 | 1.3           | 1.6           | 4.6  | 2.6           | <0.1          | <0.1          | 0.8           | 1.5           | <0.1          | <0.1          | 17.9          | 0.7           | 0.9           | 48.1          | 4.0              | <0.1        |
| ND   | Oct. 07 | Cfi   | 1.4  | 19.3 | <0.1          | 0.9           | 2.4  | 1.0           | 4.9           | 1.6           | 1.1           | <0.1          | 1.0           | <0.1          | 18.8          | <0.1          | <0.1          | 45.3          | 1.0              | <0.1        |
| ND   | Oct. 07 | Che   | 1.8  | 17.5 | 0.8           | 1.2           | 3.7  | 1.0           | 4.4           | 0.9           | 0.5           | 0.7           | 0.7           | <0.1          | 18.2          | 0.4           | 0.5           | 42.7          | 2.0              | <0.1        |
| ND   | Oct. 07 | Sel   | 2.0  | 13.7 | 5.3           | 0.8           | 1.6  | 1.2           | 9.5           | 1.5           | 1.0           | 1.1           | 0.6           | 0.5           | 15.0          | <0.1          | 0.4           | 31.8          | 4.1              | 0.9         |
| ND   | Oct. 07 | Sel   | 2.0  | 13.7 | 5.3           | 0.8           | 1.6  | 1.2           | 9.5           | 1.5           | 1.0           | 1.1           | 0.6           | 0.5           | 15.0          | <0.1          | 0.4           | 31.8          | 4.1              | 0.9         |

Appendix 1 continued

| Site | Date    | Taxon | 14:0 | 16:0 | 16:1<br>(n-7) | 16:2<br>(n-4) | 18:0 | 18:1<br>(n-7) | 18:1<br>(n-9) | 18:2<br>(n-6) | 18:3<br>(n-3) | 18:4<br>(n-3) | 20:4<br>(n-3) | 20:4<br>(n-6) | 20:5<br>(n-3) | 22:4<br>(n-6) | 22:5<br>(n-3) | 22:6<br>(n-3) | ∑Bacterial<br>FA | Other<br>FA |
|------|---------|-------|------|------|---------------|---------------|------|---------------|---------------|---------------|---------------|---------------|---------------|---------------|---------------|---------------|---------------|---------------|------------------|-------------|
| ND   | Jan. 08 | Che   | 1.8  | 18.1 | 0.7           | 1.3           | 4.1  | 1.0           | 4.3           | 0.8           | 0.6           | <0.1          | <0.1          | <0.1          | 18.0          | <0.1          | <0.1          | 48.7          | 1.0              | <0.1        |
| ND   | Jan. 08 | Mlo   | 1.1  | 15.0 | 0.8           | 1.5           | 2.2  | 1.5           | 1.7           | 0.6           | 0.3           | 0.5           | 0.4           | 1.1           | 19.6          | 0.5           | 0.7           | 47.5          | 3.2              | 0.4         |
| ND   | Jan. 08 | Sel   | 2.1  | 13.0 | 5.4           | 0.7           | 1.0  | 1.3           | 7.9           | 1.0           | 0.6           | 0.8           | 0.6           | 0.6           | 15.9          | 0.4           | 0.5           | 33.6          | 6.7              | 0.9         |
| ND   | Apr. 08 | Cfi   | 1.2  | 11.7 | 0.3           | 0.2           | 1.3  | 0.3           | 0.8           | 0.9           | 0.9           | 2.3           | 0.5           | <0.1          | 12.1          | 0.2           | 0.2           | 23.2          | 1.0              | 1.0         |
| ND   | Apr. 08 | Che   | 2.1  | 20.2 | 0.6           | 0.6           | 2.8  | 0.7           | 1.2           | 1.5           | 1.0           | 2.8           | 1.0           | <0.1          | 19.7          | 0.6           | 0.4           | 39.2          | 1.8              | 1.0         |
| ND   | Apr. 08 | Che   | 2.1  | 20.2 | 0.6           | 0.6           | 2.8  | 0.7           | 1.2           | 1.5           | 1.0           | 2.8           | 1.0           | <0.1          | 19.8          | 0.6           | 0.4           | 39.2          | 1.7              | 1.0         |
| OG   | Feb. 07 | Cfi   | 1.9  | 18.5 | 1.8           | <0.1          | 2.4  | 1.3           | 1.6           | 0.3           | <0.1          | <0.1          | 0.3           | 0.3           | 23.5          | <0.1          | 0.7           | 43.7          | 1.8              | 0.3         |
| OG   | Feb. 07 | Che   | 1.7  | 15.3 | 5.8           | <0.1          | 1.6  | 1.4           | 10.3          | 0.3           | <0.1          | <0.1          | <0.1          | 0.5           | 18.9          | 0.4           | 0.5           | 28.2          | 6.7              | 4.5         |
| OG   | Feb. 07 | Sel   | 1.6  | 13.5 | 6.1           | <0.1          | 2.6  | 1.4           | 4.7           | 0.3           | <0.1          | <0.1          | <0.1          | 1.4           | 16.0          | 0.3           | 0.6           | 26.7          | 3.4              | 17.2        |
| OG   | Feb. 07 | Mlo   | 1.7  | 20.7 | 2.1           | 0.6           | 1.7  | 1.7           | 0.8           | 0.5           | 0.4           | 1.3           | 0.6           | 0.6           | 25.2          | 0.4           | 0.9           | 34.8          | 4.0              | 0.6         |
| OG   | Feb. 07 | Tlo   | 2.9  | 27.0 | 2.6           | <0.1          | 3.0  | 5.3           | <0.1          | <0.1          | <0.1          | <0.1          | <0.1          | <0.1          | 27.3          | <0.1          | 2.5           | 29.4          | 5.3              | <0.1        |
| OG   | Apr. 07 | Apa   | 3.0  | 21.7 | 1.4           | <0.1          | 2.6  | 1.5           | <0.1          | <0.1          | <0.1          | 0.8           | <0.1          | <0.1          | 25.3          | <0.1          | 0.9           | 42.8          | 1.5              | <0.1        |
| OG   | Apr. 07 | Car   | 2.8  | 20.1 | 2.5           | 0.8           | 3.5  | 3.4           | 0.7           | 0.4           | 0.7           | 2.3           | <0.1          | 0.4           | 18.1          | 0.3           | 0.7           | 37.8          | 7.2              | 0.4         |
| OG   | Apr. 07 | Cfi   | 2.3  | 17.5 | 1.9           | <0.1          | 2.8  | 1.5           | 1.4           | <0.1          | <0.1          | <0.1          | <0.1          | <0.1          | <0.1          | <0.1          | <0.1          | 38.6          | 2.7              | 2.5         |
| OG   | Apr. 07 | Che   | 2.3  | 19.8 | 1.7           | <0.1          | 2.6  | 1.2           | 0.7           | <0.1          | <0.1          | <0.1          | <0.1          | <0.1          | 25.4          | 0.2           | 1.1           | 42.5          | 1.8              | 0.8         |
| OG   | Apr. 07 | Zoe   | 1.1  | 17.7 | 2.6           | <0.1          | 8.2  | <0.1          | 5.1           | <0.1          | <0.1          | <0.1          | <0.1          | 0.3           | 37.0          | 0.2           | <0.1          | 17.5          | 1.1              | 4.7         |
| OG   | Apr. 07 | Sel   | 0.1  | 17.2 | 7.0           | <0.1          | <0.1 | 2.6           | 5.5           | <0.1          | <0.1          | <0.1          | 0.7           | 0.6           | 21.6          | <0.1          | 1.0           | 28.8          | 10.3             | 3.6         |
| OG   | Apr. 07 | Tlo   | 3.4  | 23.2 | 1.5           | <0.1          | 2.7  | 4.5           | <0.1          | <0.1          | <0.1          | <0.1          | <0.1          | <0.1          | <0.1          | <0.1          | <0.1          | 33.6          | 5.3              | 2.4         |
| OG   | May 07  | Cfi   | 2.3  | 21.5 | 0.8           | <0.1          | 3.6  | 0.8           | 1.2           | 0.4           | <0.1          | <0.1          | 0.2           | <0.1          | 21.5          | <0.1          | 0.2           | 41.6          | 1.6              | 4.0         |
| OG   | May 07  | Che   | 1.9  | 20.4 | 0.8           | <0.1          | 3.6  | 1.2           | 2.1           | 0.7           | <0.1          | <0.1          | 0.3           | <0.1          | 24.6          | <0.1          | 0.3           | 41.1          | 1.6              | 1.3         |
| OG   | May 07  | Cty   | 3.7  | 22.9 | <0.1          | <0.1          | 4.8  | <0.1          | <0.1          | <0.1          | <0.1          | <0.1          | <0.1          | <0.1          | 19.5          | <0.1          | <0.1          | 49.0          | <0.1             | <0.1        |
| OG   | May 07  | Sel   | 1.2  | 14.6 | 6.2           | <0.1          | 1.8  | 1.8           | 7.4           | 1.7           | <0.1          | <0.1          | 0.5           | 0.3           | 20.3          | <0.1          | 0.7           | 31.3          | 4.0              | 3.8         |
| OG   | May 07  | Tlo   | 2.8  | 19.5 | 1.0           | <0.1          | 3.6  | 1.9           | 1.8           | 0.7           | <0.1          | <0.1          | 0.4           | <0.1          | 22.4          | <0.1          | 0.6           | 41.4          | 3.0              | 1.2         |

Appendix 1 continued

| Site | Date    | Taxon | 14:0 | 16:0 | 16:1<br>(n-7) | 16:2<br>(n-4) | 18:0 | 18:1<br>(n-7) | 18:1<br>(n-9) | 18:2<br>(n-6) | 18:3<br>(n-3) | 18:4<br>(n-3) | 20:4<br>(n-3) | 20:4<br>(n-6) | 20:5<br>(n-3) | 22:4<br>(n-6) | 22:5<br>(n-3) | 22:6<br>(n-3) | ∑Bacterial<br>FA | Other<br>FA |
|------|---------|-------|------|------|---------------|---------------|------|---------------|---------------|---------------|---------------|---------------|---------------|---------------|---------------|---------------|---------------|---------------|------------------|-------------|
| OG   | Sep. 07 | Che   | 2.4  | 17.0 | 1.3           | 1.1           | 4.5  | 1.1           | 1.5           | 0.8           | <0.1          | <0.1          | <0.1          | 0.8           | 21.9          | 0.9           | 1.5           | 44.3          | 1.1              | <0.1        |
| OG   | Sep. 07 | Cty   | 3.3  | 20.5 | 1.0           | 1.2           | 5.0  | 1.5           | 0.7           | 0.7           | 0.4           | 0.9           | <0.1          | 0.5           | 15.9          | 0.6           | 0.7           | 42.8          | 3.4              | 0.5         |
| OG   | Sep. 07 | Sel   | 2.6  | 13.3 | 5.2           | 1.0           | 4.9  | 1.3           | 2.7           | 0.6           | 0.9           | 1.3           | 0.5           | 0.6           | 13.2          | <0.1          | 0.5           | 43.3          | 4.0              | 1.9         |
| OG   | Sep. 07 | Zoe   | 1.6  | 19.7 | 3.1           | 1.2           | 7.4  | 3.8           | 4.5           | 0.9           | 0.8           | 1.1           | 0.4           | 1.1           | 21.7          | 0.4           | 0.6           | 22.3          | 7.3              | 1.5         |
| OG   | Sep. 07 | Zoe   | 1.2  | 18.3 | 3.1           | 1.0           | 8.3  | 4.3           | 3.8           | 0.9           | 0.4           | 0.4           | 0.4           | 2.0           | 26.8          | 0.4           | 0.7           | 22.0          | 5.9              | 1.0         |
| OG   | Oct. 07 | Che   | 1.9  | 20.2 | 1.8           | 1.0           | 4.9  | 2.7           | 2.7           | <0.1          | <0.1          | <0.1          | <0.1          | <0.1          | 20.4          | <0.1          | 0.8           | 39.8          | 2.7              | <0.1        |
| OG   | Oct. 07 | Cty   | 2.2  | 21.3 | 1.4           | 1.1           | 5.3  | 3.9           | 0.6           | 0.4           | <0.1          | 0.8           | <0.1          | <0.1          | 16.1          | 0.8           | 1.0           | 44.0          | 4.5              | 0.8         |
| OG   | Oct. 07 | Sel   | 1.5  | 6.2  | 4.2           | 0.9           | 4.1  | 1.3           | 2.4           | 0.4           | 0.5           | 1.0           | 0.3           | <0.1          | 11.6          | 0.2           | 0.6           | 45.2          | 4.4              | 5.0         |
| OG   | Jan. 08 | Che   | 1.8  | 19.7 | 1.0           | 1.2           | 3.8  | 1.6           | 2.5           | <0.1          | <0.1          | <0.1          | <0.1          | <0.1          | 19.3          | <0.1          | <0.1          | 49.2          | 1.6              | <0.1        |
| OG   | Jan. 08 | Sel   | 1.2  | 11.1 | 6.1           | 1.3           | 3.8  | 2.0           | 4.2           | 0.4           | 0.5           | 0.7           | 0.5           | 1.0           | 16.8          | 0.3           | 0.7           | 35.5          | 5.9              | 4.6         |
| OG   | Jan. 08 | Tlo   | 1.1  | 3.0  | 5.4           | <0.1          | 1.4  | 4.6           | 6.0           | <0.1          | <0.1          | <0.1          | <0.1          | <0.1          | 3.1           | <0.1          | <0.1          | 3.9           | 12.3             | 3.3         |
| OG   | Apr. 08 | Tlo   | 2.9  | 20.7 | 1.4           | 0.3           | 1.7  | 1.8           | 0.6           | 1.1           | 0.8           | 3.1           | 0.5           | <0.1          | 25.9          | <0.1          | 0.7           | 34.1          | 3.0              | 2.1         |
| SB   | Feb. 07 | Che   | 1.8  | 19.4 | 1.4           | 1.2           | 3.5  | 1.6           | 2.4           | 0.5           | <0.1          | <0.1          | <0.1          | <0.1          | 24.6          | <0.1          | 0.6           | 39.3          | 3.0              | 1.7         |
| SB   | Feb. 07 | Sel   | 1.6  | 15.2 | 5.5           | 1.3           | 3.5  | 1.9           | 4.2           | 0.3           | <0.1          | 0.5           | 0.4           | 1.9           | 20.1          | <0.1          | 0.7           | 33.3          | 5.2              | 2.2         |
| SB   | Feb. 07 | Sel   | 2.9  | 26.5 | 3.5           | <0.1          | 2.8  | 2.7           | 2.5           | 0.9           | <0.1          | <0.1          | <0.1          | 0.7           | 46.5          | <0.1          | 1.4           | <0.1          | 4.2              | 2.5         |
| SB   | Feb. 07 | Tlo   | 2.9  | 19.2 | 1.5           | 0.9           | 2.9  | 3.7           | <0.1          | <0.1          | <0.1          | 1.8           | <0.1          | 0.9           | 20.0          | 0.9           | 1.9           | 25.6          | 4.4              | 2.9         |
| SB   | Apr. 07 | Cfi   | 1.3  | 17.1 | 1.0           | <0.1          | 2.3  | 1.2           | 1.8           | <0.1          | <0.1          | <0.1          | <0.1          | <0.1          | 25.8          | <0.1          | 0.6           | 42.0          | 3.2              | 2.9         |
| SB   | Apr. 07 | Che   | 1.4  | 17.3 | 0.9           | <0.1          | 2.7  | 1.0           | 1.3           | <0.1          | <0.1          | <0.1          | <0.1          | <0.1          | 22.8          | <0.1          | 0.6           | 46.4          | 2.7              | 2.2         |
| SB   | Apr. 07 | Cty   | 2.0  | 10.4 | <0.1          | <0.1          | 2.4  | 1.9           | 7.9           | <0.1          | <0.1          | <0.1          | <0.1          | <0.1          | 9.0           | <0.1          | <0.1          | 18.8          | 11.2             | <0.1        |
| SB   | Apr. 07 | Sel   | 1.8  | 19.2 | 5.9           | 0.6           | 3.3  | 2.1           | 5.5           | 0.5           | 0.3           | 0.7           | 0.4           | 0.6           | 21.7          | 0.5           | 0.9           | 25.8          | 4.5              | 1.7         |
| SB   | Apr. 07 | Tlo   | 3.1  | 22.6 | 1.4           | <0.1          | 2.5  | 2.9           | 0.4           | <0.1          | <0.1          | <0.1          | <0.1          | <0.1          | 28.9          | <0.1          | 1.8           | 32.5          | 4.2              | 1.7         |
| SB   | Apr. 07 | Zoe   | 0.7  | 17.1 | 2.1           | <0.1          | 8.7  | <0.1          | 6.0           | <0.1          | <0.1          | <0.1          | <0.1          | <0.1          | 37.2          | <0.1          | <0.1          | 13.6          | 2.2              | 6.8         |

Appendix 1 continued

| Site | Date    | Taxon | 14:0 | 16:0 | 16:1  | 16:2  | 18:0  | 18:1  | 18:1  | 18:2  | 18:3  | 18:4  | 20:4  | 20:4  | 20:5  | 22:4  | 22:5  | 22:6 | ∑Bacterial | Other |
|------|---------|-------|------|------|-------|-------|-------|-------|-------|-------|-------|-------|-------|-------|-------|-------|-------|------|------------|-------|
|      |         |       |      |      | (n-7) | (n-4) | (n-7) | (n-9) | (n-6) | (n-3) | (n-3) | (n-3) | (n-6) | (n-3) | (n-6) | (n-3) | (n-3) | FA   | FA         |       |
| SB   | May 07  | Apa   | 4.3  | 20.3 | 1.2   | <0.1  | 4.8   | 1.6   | 1.0   | 0.2   | <0.1  | <0.1  | 0.1   | 0.5   | 16.0  | <0.1  | 0.3   | 37.2 | 6.0        | 3.7   |
| SB   | May 07  | Cfi   | 2.1  | 18.8 | <0.1  | <0.1  | 3.9   | <0.1  | 6.5   | <0.1  | <0.1  | <0.1  | <0.1  | <0.1  | 18.6  | <0.1  | <0.1  | 35.4 | 1.6        | <0.1  |
| SB   | May 07  | Che   | 2.3  | 21.0 | 0.8   | 1.1   | 4.1   | 1.3   | 2.2   | 0.4   | 0.7   | 2.0   | 1.9   | 1.0   | 17.2  | 0.6   | 0.7   | 39.0 | 3.2        | <0.1  |
| SB   | May 07  | Tlo   | 4.0  | 19.9 | 1.4   | <0.1  | <0.1  | 2.9   | 1.7   | <0.1  | <0.1  | <0.1  | <0.1  | 1.6   | 19.7  | <0.1  | 1.0   | 37.4 | 4.0        | 5.4   |
| SB   | May 07  | Zoe   | 1.9  | 16.2 | 1.1   | <0.1  | 6.4   | 5.8   | 11.9  | 0.8   | <0.1  | <0.1  | 0.7   | 2.0   | 19.9  | <0.1  | 0.4   | 0.1  | 8.5        | 24.7  |
| SB   | Sep. 07 | Car   | 3.6  | 20.6 | 1.3   | 1.6   | 4.9   | 1.8   | 0.2   | 0.3   | 1.1   | 3.0   | 0.3   | 0.7   | 17.6  | 0.7   | 0.8   | 35.7 | 4.9        | 0.8   |
| SB   | Sep. 07 | Zoe   | 1.4  | 23.1 | <0.1  | 2.5   | 15.5  | 7.7   | 6.5   | 1.2   | 0.5   | 0.9   | 0.8   | <0.1  | 1.1   | 1.3   | 1.1   | 24.9 | 10.1       | 4.1   |
| SB   | Oct. 07 | Che   | 1.9  | 21.4 | 1.4   | 1.4   | 3.7   | 1.0   | 1.5   | 0.4   | 0.4   | 0.7   | 0.4   | <0.1  | 21.4  | 0.3   | 0.4   | 39.9 | 2.6        | 1.3   |
| SB   | Oct. 07 | Cty   | 2.5  | 18.4 | 0.6   | 1.8   | 5.6   | 1.8   | <0.1  | 0.6   | <0.1  | 1.0   | <0.1  | <0.1  | 18.7  | <0.1  | 0.8   | 46.3 | 2.8        | 0.9   |
| SB   | Oct. 07 | Tlo   | 3.3  | 22.4 | 1.4   | <0.1  | 3.4   | 3.2   | <0.1  | <0.1  | <0.1  | <0.1  | <0.1  | <0.1  | 22.9  | <0.1  | <0.1  | 43.3 | 3.2        | <0.1  |
| SB   | Jan. 08 | Sel   | 2.0  | 13.0 | 6.6   | 1.2   | 3.3   | 2.0   | 3.5   | 0.3   | 0.4   | 0.4   | 0.4   | 1.4   | 17.9  | <0.1  | 0.5   | 34.1 | 5.6        | 2.3   |
| SB   | Apr. 08 | Cfi   | 2.8  | 26.5 | 2.0   | 0.5   | 2.4   | 1.0   | 0.6   | 0.2   | <0.1  | 0.5   | 0.3   | <0.1  | 20.3  | 0.3   | 0.9   | 35.2 | 2.7        | 0.6   |
| SB   | Apr. 08 | Che   | 2.2  | 21.1 | 1.3   | 0.5   | 2.7   | 1.1   | 0.7   | 0.3   | 0.2   | 0.8   | 0.6   | 0.3   | 22.8  | 0.4   | 1.0   | 36.5 | 3.1        | 1.3   |
| SB   | Apr. 08 | Pel   | 2.0  | 21.6 | 1.5   | 0.5   | 2.2   | 2.1   | 1.2   | 0.5   | <0.1  | 1.1   | 0.8   | <0.1  | 26.9  | 0.6   | 2.0   | 31.1 | 3.2        | 1.1   |
| SB   | Apr. 08 | Sel   | 1.8  | 10.5 | 0.7   | 0.2   | 0.7   | 0.7   | 2.9   | 1.2   | 1.3   | 3.0   | 0.6   | <0.1  | 10.2  | 0.3   | 0.2   | 16.1 | 3.5        | 2.7   |
